# Supplementary material
Source: HighWire-hosted journal article supplement (https://jnm.snmjournals.org/highwire/filestream/94331/field_highwire_adjunct_files/0/105825_Supplemental_Data.pdf)
Supplement: 105825_Supplemental_Data.pdf [file 105825_Supplemental_Data.pdf]

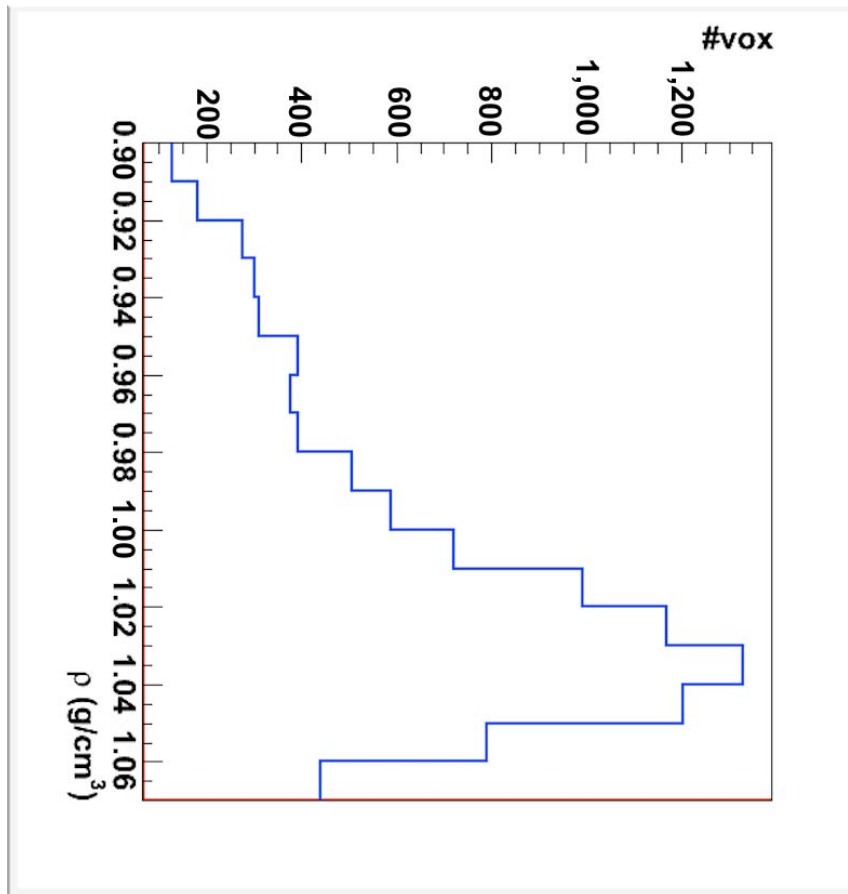

Supplemental Figure 1: Case 1, a NHL treated with  $^{131}\text{I}$ -tositumomab, density histogram of voxels with absorbed doses above 1 Gy and density values above  $0.90 \text{ g}\cdot\text{cm}^{-3}$ , used for the linear correlation.

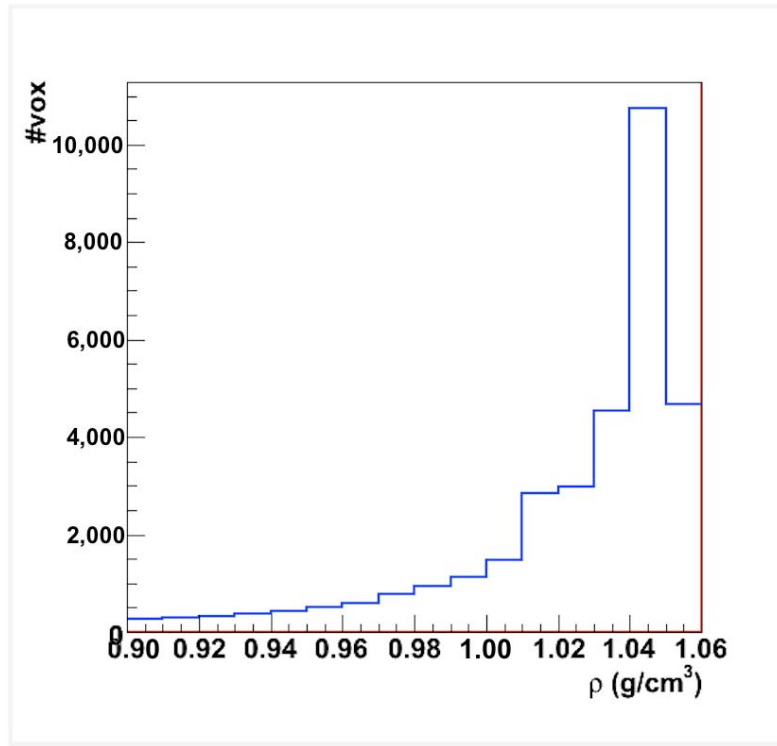

Supplemental Figure 2: Case 2, a simulation of <sup>177</sup>Lu-peptide, density histogram of voxels with absorbed doses above 1 Gy and density values above 0.90 g.cm<sup>-3</sup>, used for the linear correlation.

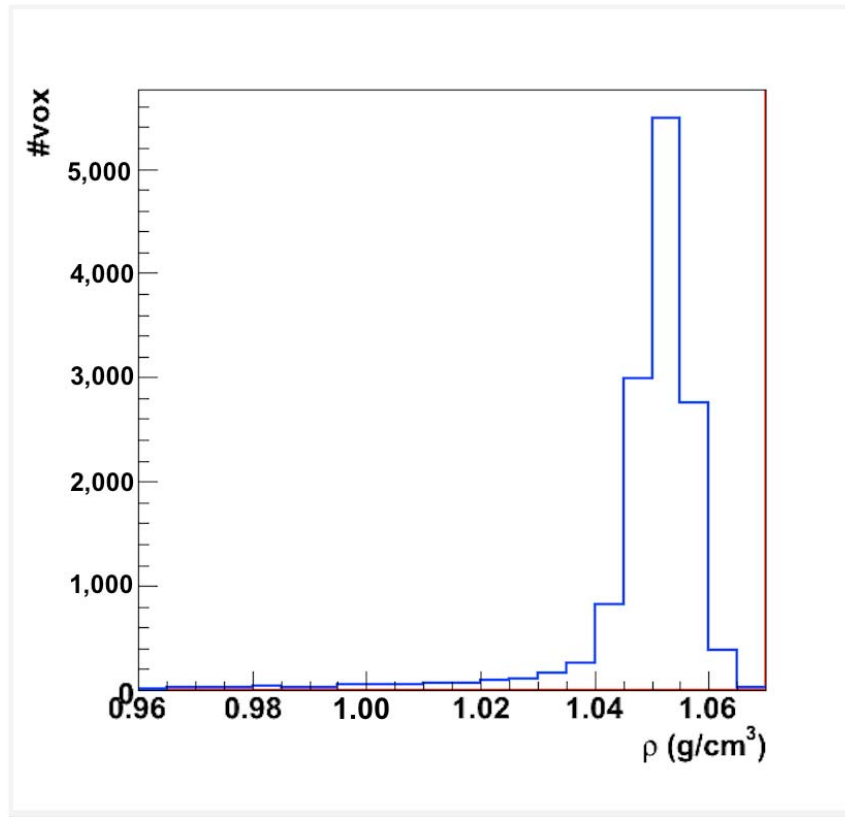

Supplemental Figure 3: Case 3, a HCC treated with  $^{90}\text{Y}$ -microspheres, density histogram of voxels with absorbed doses above 1 Gy and density values above  $0.96 \text{ g}\cdot\text{cm}^{-3}$ , used for the linear correlation.
